# Supplementary material for: FliH and FliI ensure efficient energy coupling of flagellar type III protein export in Salmonella
Source: PubMed Central journal article supplement (PMC4905995; doi:10.1002/mbo3.340), 2016-02-25
Supplement: MBO3-5-424-s001.pdf [file MBO3-5-424-s001.pdf]

## **Supporting Information**

**FliH and FliI ensure efficient energy coupling of flagellar  
type III protein export in *Salmonella***

**Tohru Minamino, Miki Kinoshita, Yumi Inoue, Yusuke V. Morimoto,  
Kunio Ihara, Satomi Koya, Noritaka Hara, Noriko Nishioka, Seiji  
Kojima, Michio Homma and Keiichi Namba**



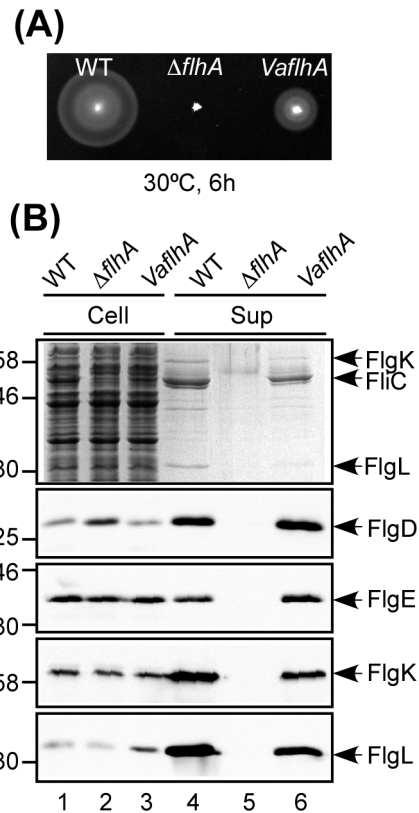

**Figure S2. Characterization of a *Salmonella VafIhA* strain.** (A) Motility of SJW1103 (WT), NH001 ( $\Delta flhA$ ) and MMA2001 (*VafIhA*) in soft agar. The *flhA* gene on the chromosome was replaced by the *Vibrio flhA* gene. Plates were incubated at 30 °C for 6 hours. (B) Secretion assays. Whole cell proteins (Cell) and culture supernatant fractions (Sup) were prepared from the above strains, and then analyzed by CBB staining (1st row) and immunoblotting, using polyclonal anti-FlgD (2nd row), anti-FlgE (3rd row), anti-FlgK (4th row) or anti-FlgL (5th row) antibody. The positions of molecular mass markers are indicated on the left.

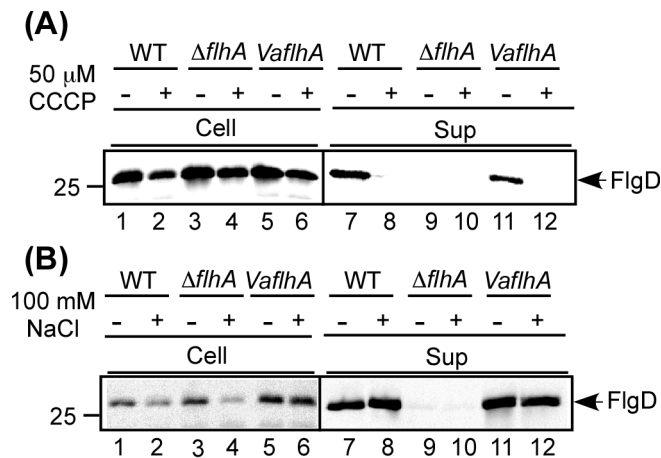

**Figure S3. Effects of (A) CCCP and (B) 100 mM NaCl on the level of FlgD secreted by the *VafIhA* cells.** (A) Immunoblotting, using polyclonal anti-FlgD antibody, of whole cell proteins (Cell) and culture supernatant fractions (Sup) prepared from SJW1103 carrying pSU41 (WT), NH001 harbouring pSU41 ( $\Delta flhA$ ) and NH001 transformed with pNY101 (*VafIhA*) grown in the presence and absence of 50  $\mu$ M CCCP. (B) Immunoblotting, using polyclonal anti-FlgD antibody, of whole cell proteins (Cell) and culture supernatant fractions (Sup) prepared from SJW1103 carrying pSU41 (WT), NH001 harbouring pSU41 ( $\Delta flhA$ ) and NH001 transformed with pNY101 (*VafIhA*) grown in the presence and absence of 100 mM NaCl.

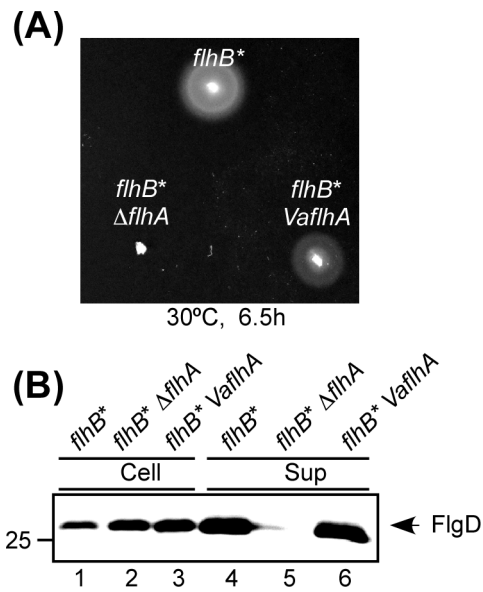

**Figure S4. Effect of the FlhB(P28T) mutation on motility of the *VafIhA* cells.** (A) Motility of MMB017 carrying pSU41 (*flhB\**), NH002 harboring pSU41 (*flhB\**  $\Delta$ *flhA*) and NH002 transformed with pNY101 (*flhB\** *VafIhA*) in soft agar. Plates were incubated at 30 °C for 6.5 hours. (B) Secretion assays. Immunoblotting, using polyclonal anti-FlgD antibody, of whole cell proteins (Cell) and culture supernatant fractions (Sup) prepared from the same transformants.
